# Supplementary material
Source: Springer Nature journal article supplement (https://www.springermedizin.de/resource/supplementary/12960_2014_435_MOESM2_ESM.pdf/9570080)

# Improvements in Integration Indicators

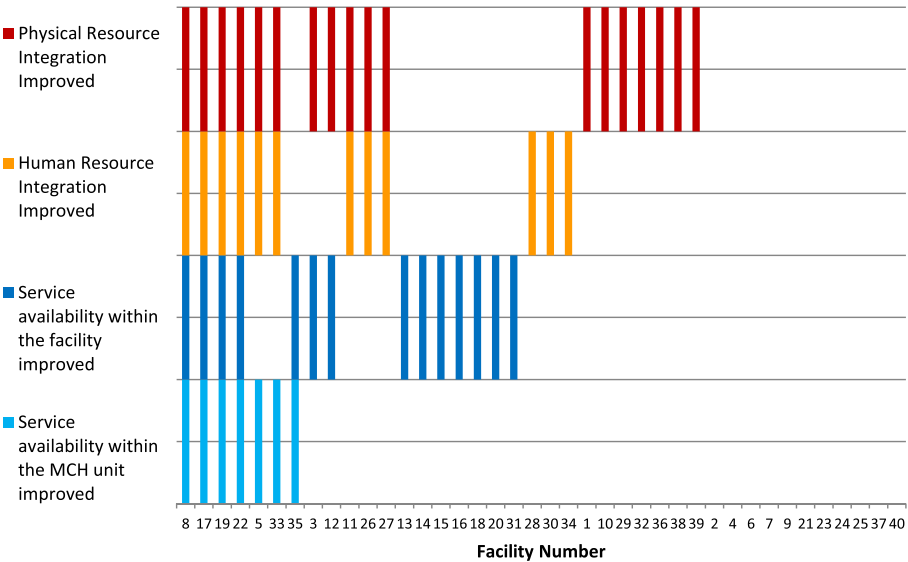

Supplement: MOESM2 [file 9570080]
